# Supplementary material for: Diagnostic Leukapheresis Enables Reliable Transcriptomic Profiling of Single Circulating Tumor Cells to Characterize Inter-Cellular Heterogeneity in Terms of Endocrine Resistance
Source: PubMed Central journal article supplement (PMC6679140; doi:10.3390/cancers11070903), 2019-06-28

# Supplementary Materials: Diagnostic Leukapheresis Enables Reliable Transcriptomic Profiling of Single Circulating Tumor Cells to Characterize Inter-Cellular Heterogeneity in Terms of Endocrine Resistance

Florian Reinhardt, André Franken, Franziska Meier-Stiegen, Christiane Driemel, Nikolas H. Stoecklein, Johannes C. Fischer, Dieter Niederacher, Eugen Ruckhaeberle, Tanja Fehm and Hans Neubauer

**Table S1.** Gene panel. Genes used to profile single cell line cells, cCTCs and CTCs.

| EpCAM     | Epithelial Cell Adhesion Molecule                         |
|-----------|-----------------------------------------------------------|
| MUC1      | Mucin 1                                                   |
| KRT19     | Keratin 19                                                |
| CDH2      | Cadherin 2                                                |
| SNAI1     | Snail family zinc finger 1                                |
| VIM       | Vimentin                                                  |
| Twist1    | Twist family HHLH transcription factor 1                  |
| ALDH      | Aldehyde dehydrogenase 1 family, member A1                |
| CD_44 all | CD44 molecule                                             |
| CD24L4    | CD24 molecule                                             |
| Myc       | V-myc avian myelocytomatosis viral oncogene homolog       |
| ESR1      | Estrogen receptor 1                                       |
| ESR2      | Estrogen receptor 2                                       |
| PGR       | Progesterone receptor                                     |
| ERBB2     | V-erb-b2 erythroblastic leukemia viral oncogene homolog 2 |
| EGFR      | Epidermal growth factor receptor                          |
| VEGFR1    | Fms-related tyrosine kinase 1                             |
| VEGFR2    | Kinase insert domain receptor                             |
| IGFR      | Insulin-like growth factor 1 receptor                     |
| VEGFA     | Vascular endothelial growth factor A                      |
| PI3K      | Phosphoinositide-3-kinase                                 |
| AKT2      | V-akt murine thymoma viral oncogene homolog 2             |
| mTOR      | Mechanistic target of rapamycin                           |
| FOXO      | Forkhead box O3                                           |
| PTEN      | Phosphatase and tensin homolog                            |
| CCND1     | Cyclin D1                                                 |
| HDAC2     | Histone deacetylase 2                                     |
| GAPDH     | Glyceraldehyde-3-phosphate dehydrogenase                  |
| ACTB      | Actin beta                                                |
| UBC       | Ubiquitin C                                               |

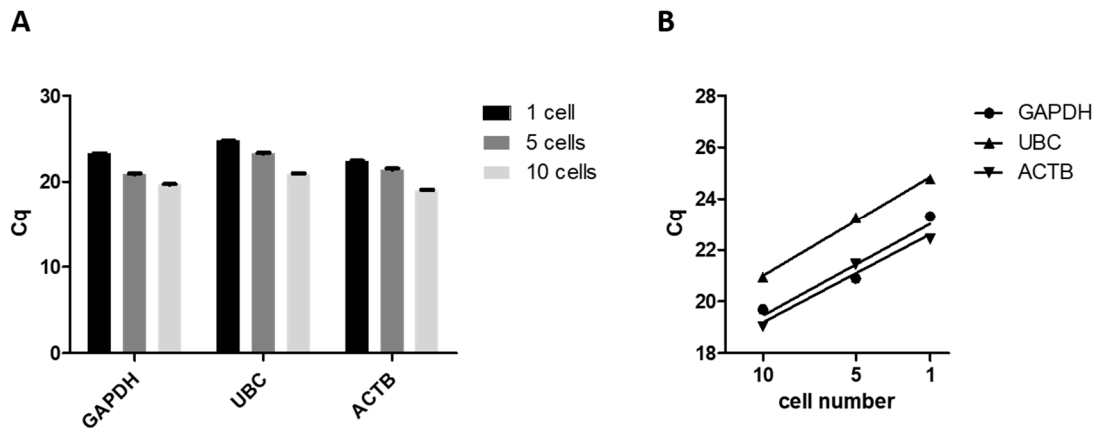

**Figure S1.** Single cell analytics (A) Cq measurements of the reference genes *GAPDH*, *UBC* and *ACTB* of 1, 5 and 10 MDA-MB-231 cells. Each gene is measured in triplicate. (B) Regression analysis of detected Cq measurements of the reference genes *GAPDH*, *UBC* and *ACTB* of 1, 5 and 10 MDA-MB-231 cells.

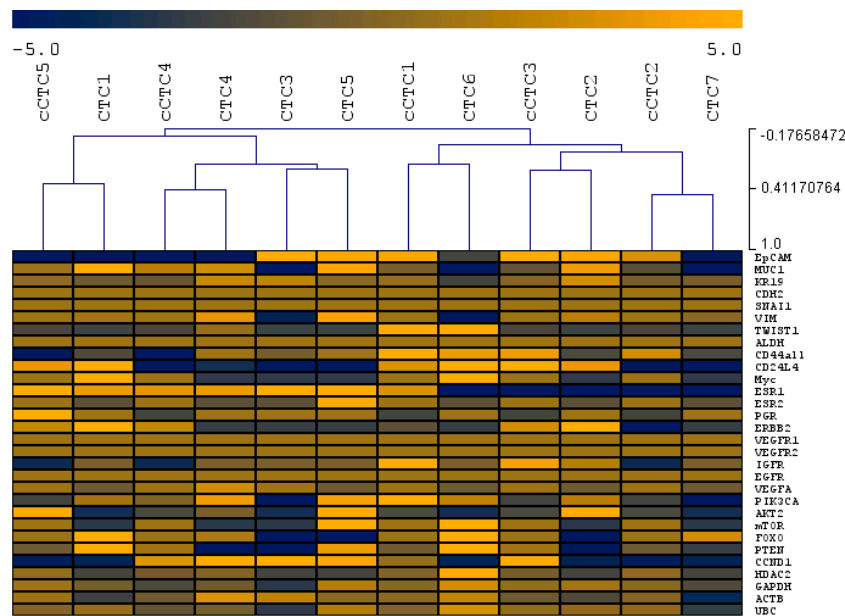

**Figure S2.** Combined gene expression analysis of single uncultured and cultured CTCs. Dendrogram and heat map analyses of Cq measurements of single CTCs ( $n = 7$ ) and cCTCs ( $n = 5$ ). Each gene is measured in triplicate. Data are mean centered, with mean expression responses to zero. Yellow indicates high expression and blue color represents downregulation relative to the mean of the pool.

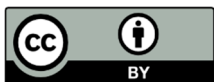

Supplement: cancers-11-00903-s001.pdf [file cancers-11-00903-s001.pdf]
